# Supplementary material for: Creating Stretchable Electronics from Dual Layer Flex-PCB for Soft Robotic Cardiac Mapping Catheters
Source: MDPI journal article supplement (doi:10.3390/mi14040884), 2023-04-20
Supplement: s1 [file s1]

# Creating Stretchable Electronics from Dual Layer Flex-PCB for Soft Robotic Cardiac Mapping Catheters

Abdellatif Ait Lahcen <sup>1</sup>, Alexandre Caprio <sup>1</sup>, Weihow Hsue <sup>2</sup>, Cory Tschabrunn <sup>3</sup>, Christopher Liu <sup>4</sup>, Bobak Mosadegh <sup>1,\*</sup> and Simon Dunham <sup>1,\*</sup>

<sup>1</sup> Dalio Institute for Cardiovascular Imaging, Department of Radiology, Weill Cornell Medicine, New York, NY 10021, USA

<sup>2</sup> Department of Clinical Sciences, College of Veterinary Medicine, Cornell University, Ithaca, NY 14853, USA

<sup>3</sup> Electrophysiology Section, Cardiovascular Division, Hospital of the University of Pennsylvania, Philadelphia, PA 19104, USA

<sup>4</sup> Department of Cardiology, Weill Cornell Medicine, New York, NY 10021, USA

\* Correspondence: bom2008@med.cornell.edu (B.M.); sid2012@med.cornell.edu (S.D.)

## Supporting materials

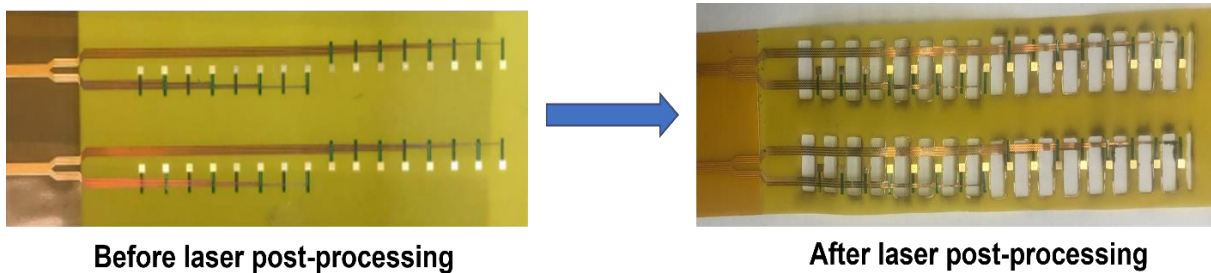

**Figure S1.** Image of dual-layer Flex-PCB before and after laser postprocessing at optimized power values. Laser speed: 20%.

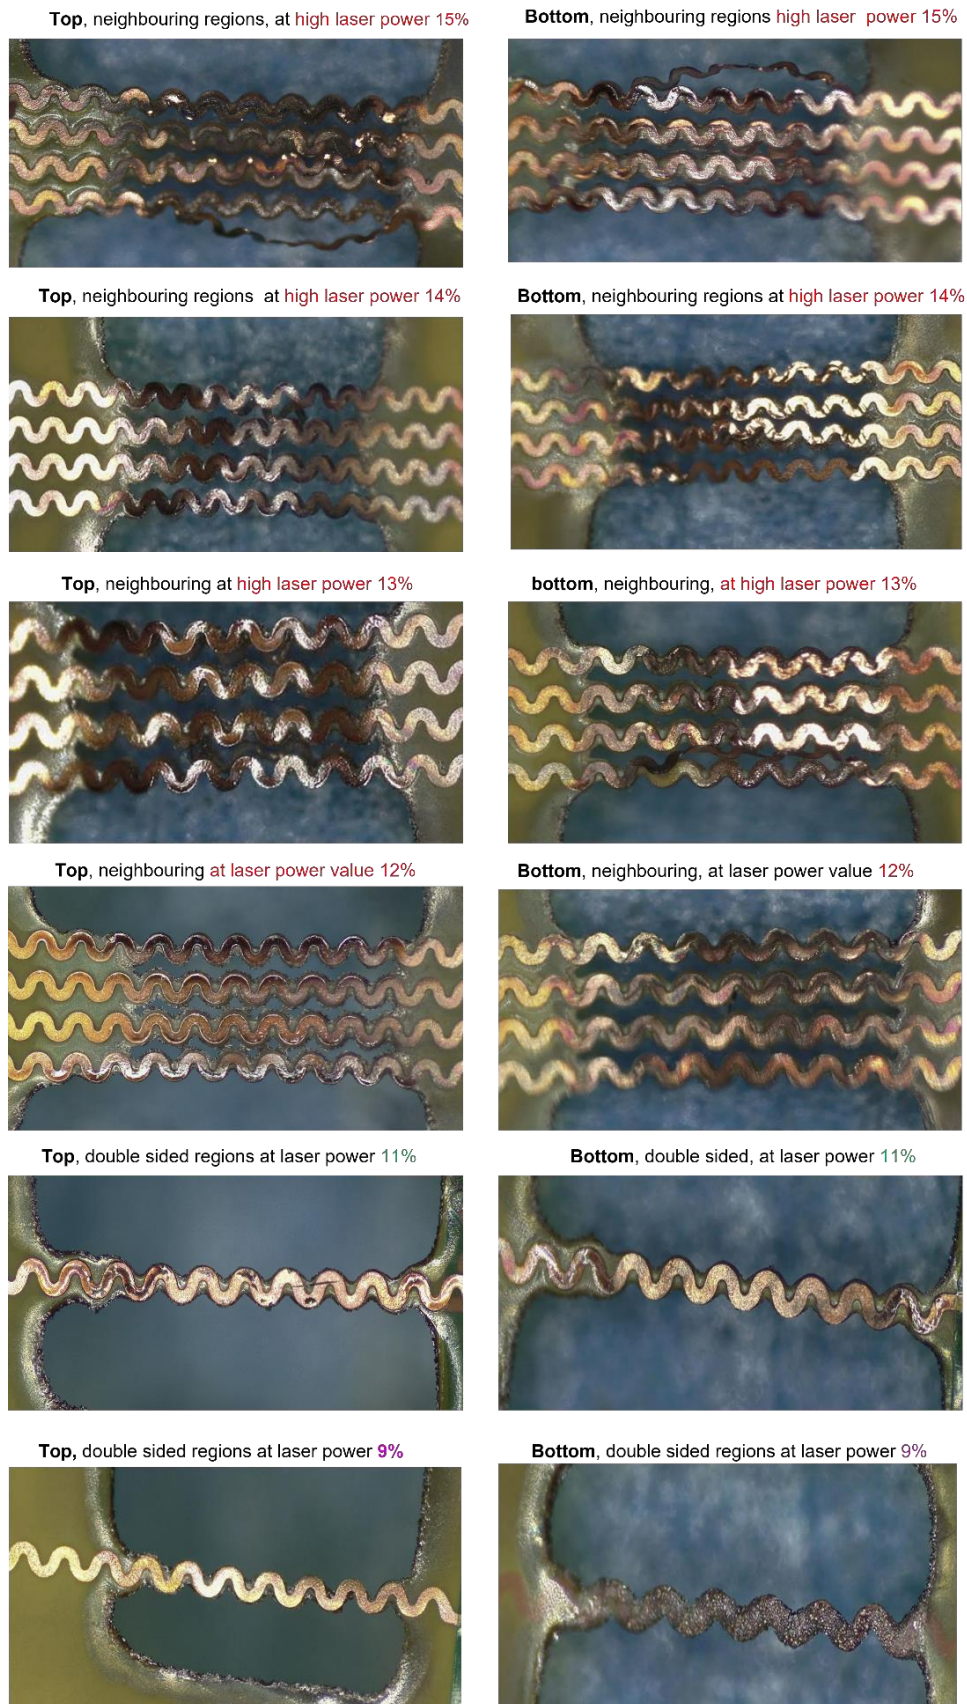

**Figure S2.** Microscope images for the different laser postprocessed flex-PCB regions under different laser power values.
